# Supplementary material
Source: PubMed Central journal article supplement (PMC4017638)
Supplement: NIHMS569610-supplement-Supplemental_table_1.pdf [file NIHMS569610-supplement-Supplemental_table_1.pdf]

| Table 1  |          | Resistance       | AP threshold       | AP amplitude   | AP halfwidth | AHP            |
|----------|----------|------------------|--------------------|----------------|--------------|----------------|
|          |          | (Mohm)           | (mV)               | (mV)           | ( $\mu$ s)   | (mV)           |
| CHCs     | n = 18   | 175.6 $\pm$ 14.6 | (-) 36.6 $\pm$ 1.4 | 50.5 $\pm$ 1.9 | 380 $\pm$ 11 | 16.8 $\pm$ 0.9 |
| PV cells | n = 21   | 70.9 $\pm$ 6.2   | (-) 29.2 $\pm$ 1.0 | 45.6 $\pm$ 1.1 | 338 $\pm$ 8  | 27.0 $\pm$ 0.5 |
|          | <i>p</i> | ***              | ***                | 0.041          | **           | ***            |
