# Supplementary material
Source: PubMed Central journal article supplement (PMC4017638)
Supplement: NIHMS569610-supplement-Supplemental_table_2.pdf [file NIHMS569610-supplement-Supplemental_table_2.pdf]

| Table 2  |        | initial-firing |            | maximal firing |              | adaptation index |
|----------|--------|----------------|------------|----------------|--------------|------------------|
|          |        | current        | frequency  | current        | frequency    | (4th/last)       |
|          |        | (pA)           | (Hz)       |                |              |                  |
| CHCs     | n = 14 | 136 ± 11       | 50.4 ± 5.1 | 521 ± 38       | 222.1 ± 10.9 | 1.36 ± 0.04      |
| PV cells | n = 11 | 441 ± 48       | 75.6 ± 6.4 | 1682 ± 121     | 352.0 ± 13.6 | 1.09 ± 0.02      |
| <i>p</i> |        | ***            | **         | ***            | ***          | ***              |
