# Supplementary material
Source: PubMed Central journal article supplement (PMC4017638)

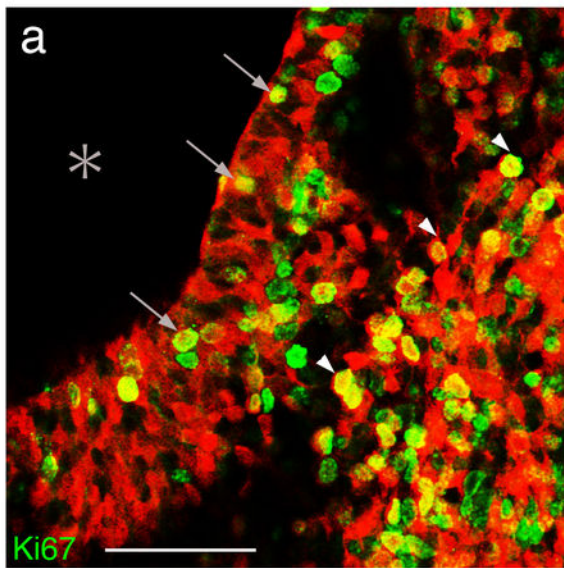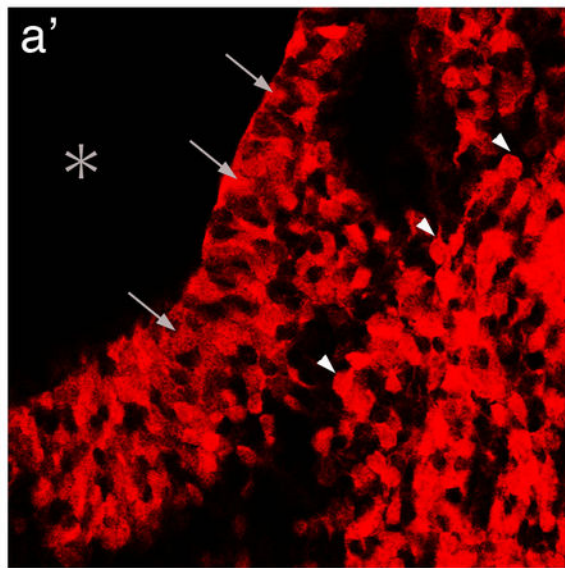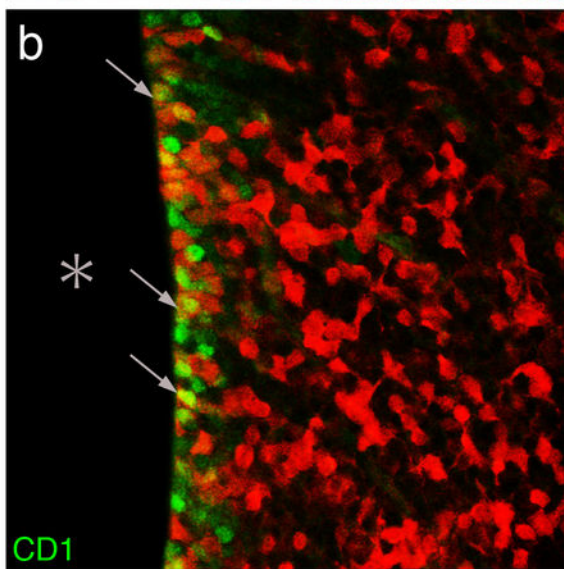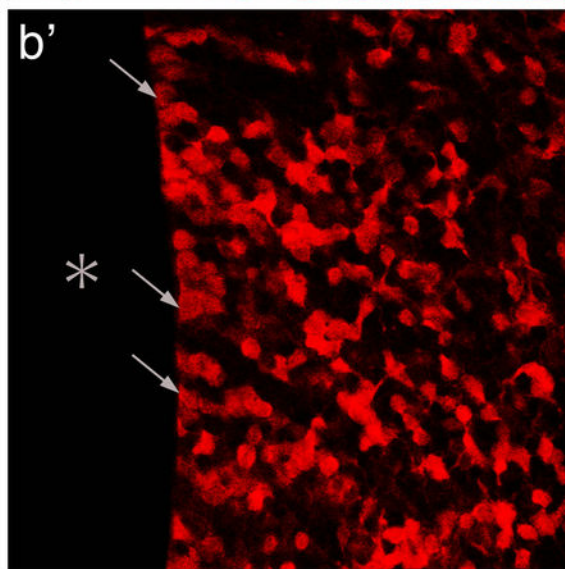

Supplement: NIHMS569610-supplement-Supplemental_figure_1.pdf [file NIHMS569610-supplement-Supplemental_figure_1.pdf]

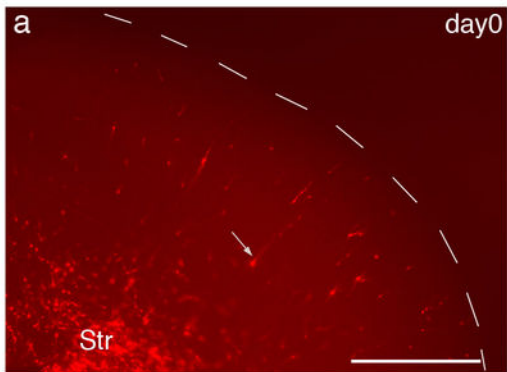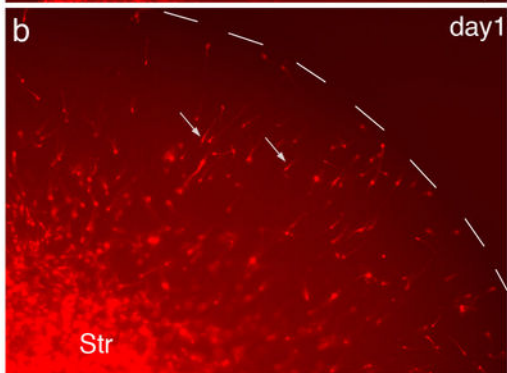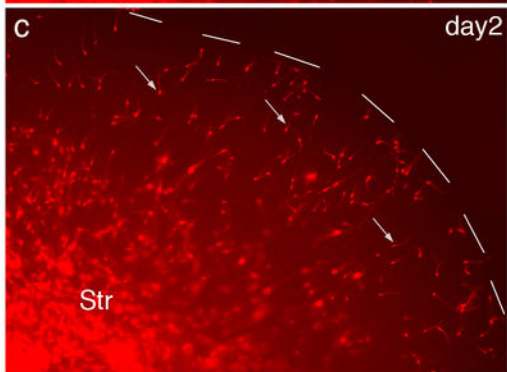

Supplement: NIHMS569610-supplement-Supplemental_figure_2.pdf [file NIHMS569610-supplement-Supplemental_figure_2.pdf]

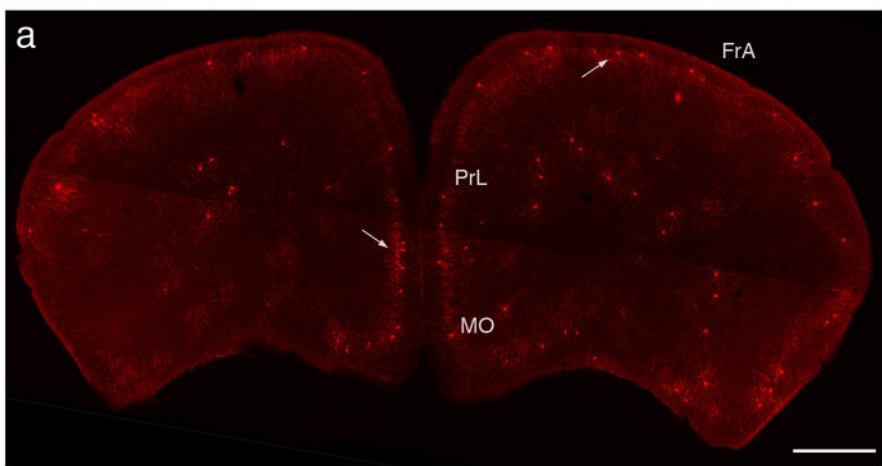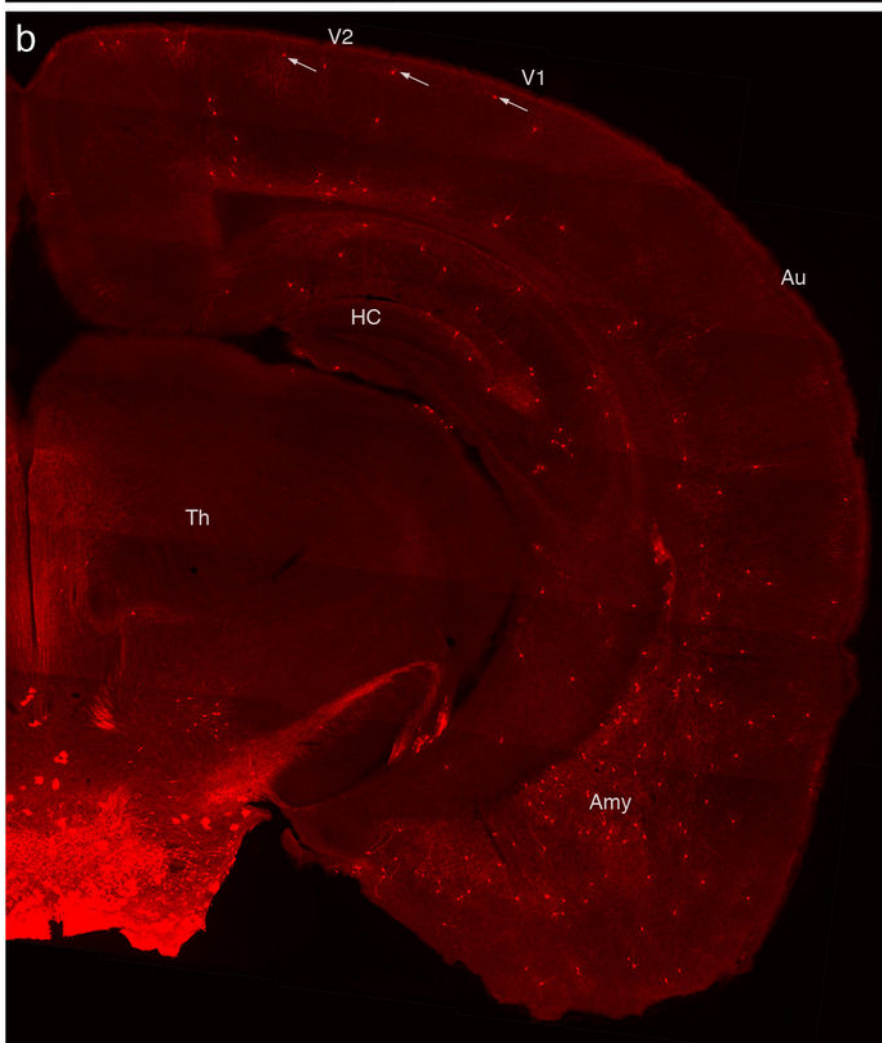

Supplement: NIHMS569610-supplement-Supplemental_figure_3.pdf [file NIHMS569610-supplement-Supplemental_figure_3.pdf]

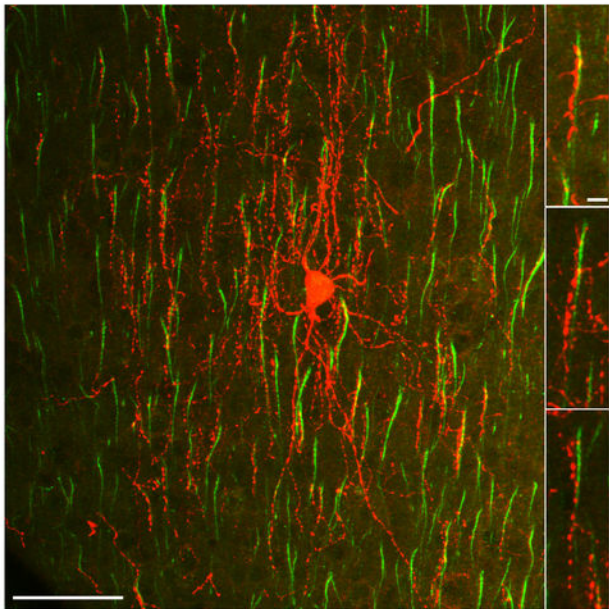

Supplement: NIHMS569610-supplement-Supplemental_figure_4.pdf [file NIHMS569610-supplement-Supplemental_figure_4.pdf]

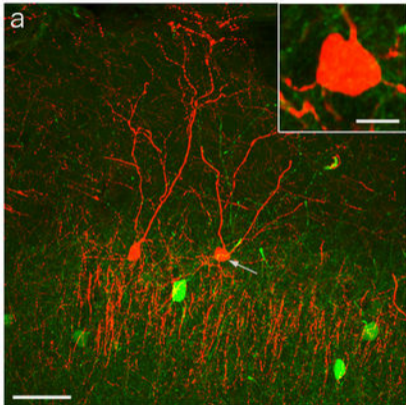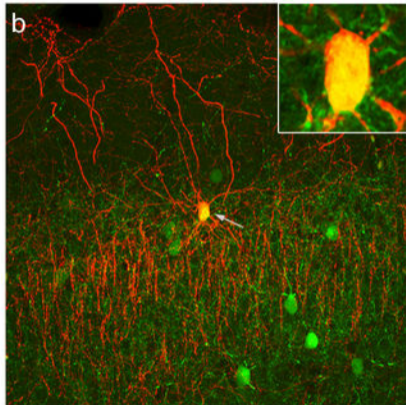

Supplement: NIHMS569610-supplement-Supplemental_figure_5.pdf [file NIHMS569610-supplement-Supplemental_figure_5.pdf]

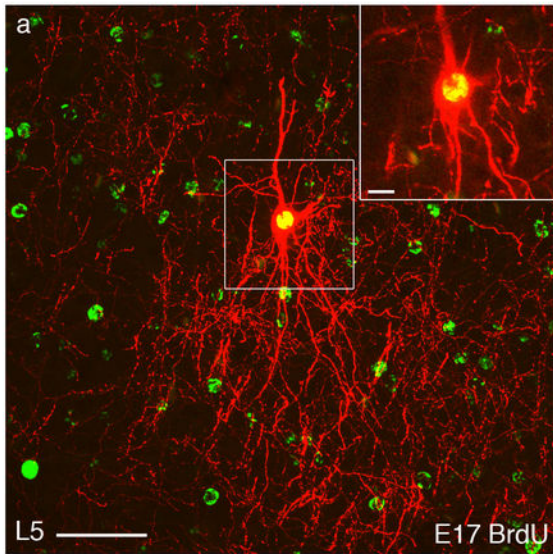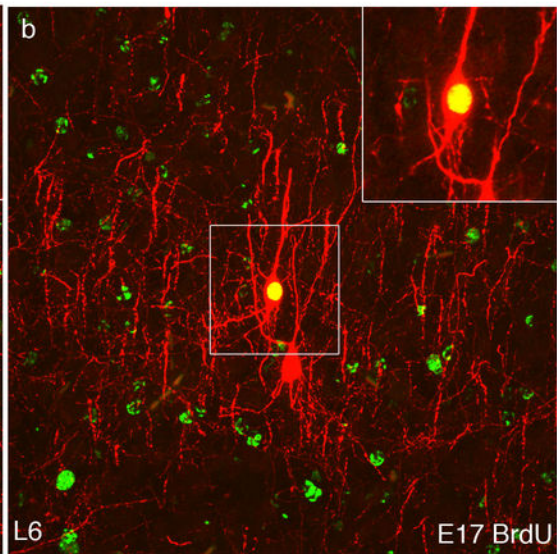

Supplement: NIHMS569610-supplement-Supplemental_figure_6.pdf [file NIHMS569610-supplement-Supplemental_figure_6.pdf]

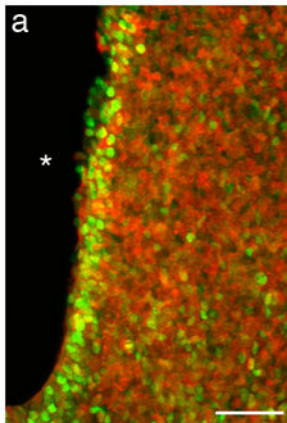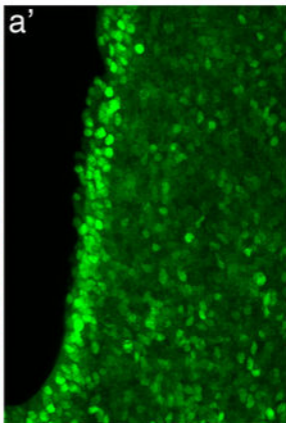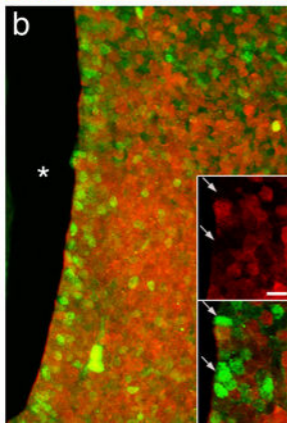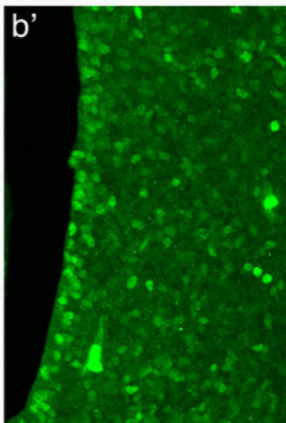

Supplement: NIHMS569610-supplement-Supplemental_figure_7.pdf [file NIHMS569610-supplement-Supplemental_figure_7.pdf]

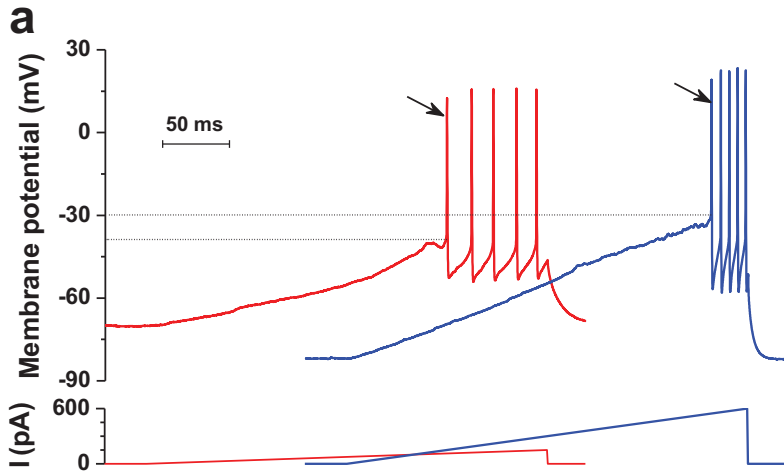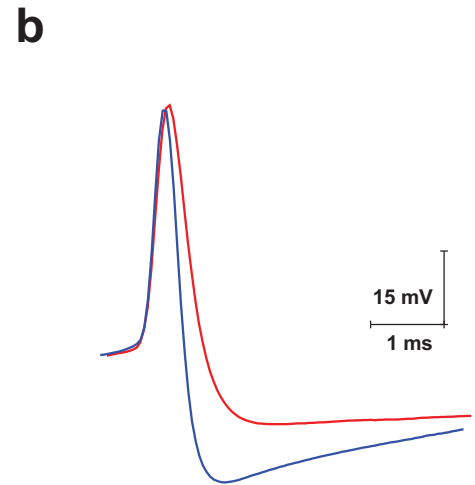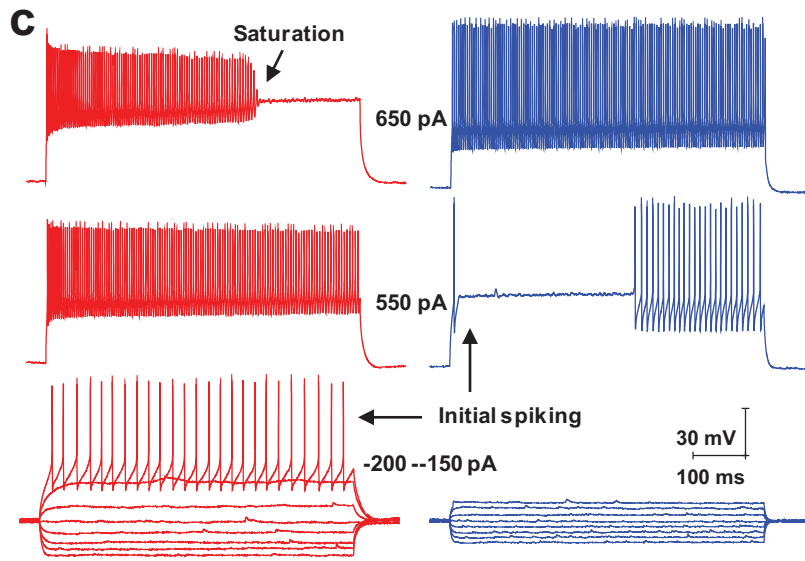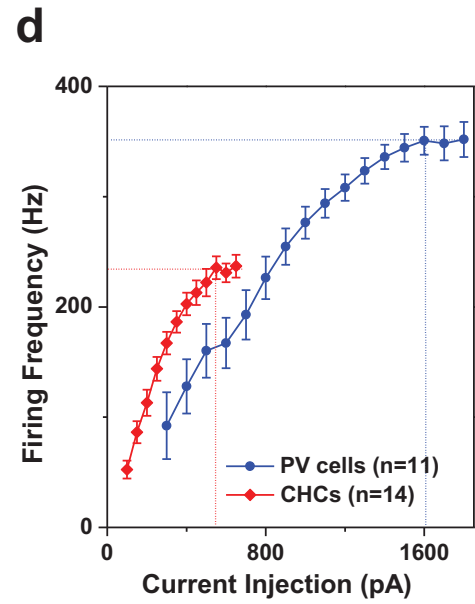

Supplement: NIHMS569610-supplement-Supplemental_figure_8.pdf [file NIHMS569610-supplement-Supplemental_figure_8.pdf]
